# Supplementary material for: Epidemiology, classification and treatment of patella fractures: an observational study of 3194 fractures from the Swedish Fracture Register
Source: PubMed Central journal article supplement (PMC9712342; doi:10.1007/s00068-022-01993-0), 2022-05-30
Supplement: 68_2022_1993_MOESM1_ESM.pdf [file 68_2022_1993_MOESM1_ESM.pdf]

Supplementary Table 1 - Fracture pattern and Surgical Procedure

|                               | <b>Avulsion</b> | <b>Extraarticular fragment</b> | <b>Vertical lateral</b> |
|-------------------------------|-----------------|--------------------------------|-------------------------|
|                               | <b>(N=405)</b>  | <b>(N=105)</b>                 | <b>(N=628)</b>          |
| <b>Procedure</b>              |                 |                                |                         |
| Cast, brace, other bandaging  | 309 (76.3%)     | 89 (84.8%)                     | 610 (97.2%)             |
| TBW                           | 59 (14.6%)      | 2 (1.9%)                       | 2 (0.3%)                |
| Combined method               | 4 (1.0%)        | 0 (0%)                         | 1 (0.2%)                |
| Other surgery                 | 12 (3.0%)       | 1 (1.0%)                       | 1 (0.2%)                |
| Plate fixation                | 1 (0.2%)        | 0 (0%)                         | 2 (0.3%)                |
| Screw fixation                | 3 (0.7%)        | 0 (0%)                         | 3 (0.5%)                |
| Excision surgery              | 5 (1.2%)        | 3 (2.9%)                       | 0 (0%)                  |
| Fixation cartilage            | 0 (0%)          | 1 (1.0%)                       | 1 (0.2%)                |
| Synovial surgery, arthroscopy | 1 (0.2%)        | 0 (0%)                         | 0 (0%)                  |
| External fixation             | 0 (0%)          | 0 (0%)                         | 0 (0%)                  |
| Missing                       | 11 (2.7%)       | 9 (8.6%)                       | 8 (1.3%)                |

| <b>Vertical medial</b><br>(N=217) | <b>Horizontal simple</b><br>(N=943) | <b>Horizontal wedge</b><br>(N=353) | <b>Horizontal multifragmentary</b><br>(N=500) | <b>Not classified</b><br>(N=43) | <b>Overall</b><br>(N=3194) |
|-----------------------------------|-------------------------------------|------------------------------------|-----------------------------------------------|---------------------------------|----------------------------|
| 196 (90.4%)                       | 534 (56.6%)                         | 164 (46.4%)                        | 207 (41.4%)                                   | 29 (67.4%)                      | 2138 (66.9%)               |
| 2 (0.9%)                          | 326 (34.6%)                         | 150 (42.5%)                        | 227 (45.4%)                                   | 2 (4.7%)                        | 770 (24.1%)                |
| 0 (0%)                            | 20 (2.1%)                           | 15 (4.2%)                          | 13 (2.6%)                                     | 0 (0%)                          | 53 (1.7%)                  |
| 1 (0.5%)                          | 4 (0.4%)                            | 1 (0.3%)                           | 8 (1.6%)                                      | 0 (0%)                          | 28 (0.8%)                  |
| 0 (0%)                            | 3 (0.3%)                            | 1 (0.3%)                           | 16 (3.2%)                                     | 0 (0%)                          | 23 (0.7%)                  |
| 3 (1.4%)                          | 9 (1.0%)                            | 2 (0.6%)                           | 0 (0%)                                        | 1 (2.3%)                        | 21 (0.7%)                  |
| 3 (1.4%)                          | 0 (0%)                              | 0 (0%)                             | 2 (0.4%)                                      | 0 (0%)                          | 13 (0.4%)                  |
| 3 (1.4%)                          | 2 (0.2%)                            | 0 (0%)                             | 1 (0.2%)                                      | 1 (2.3%)                        | 9 (0.3%)                   |
| 1 (0.5%)                          | 0 (0%)                              | 0 (0%)                             | 0 (0%)                                        | 1 (2.3%)                        | 3 (0.1%)                   |
| 0 (0%)                            | 1 (0.1%)                            | 0 (0%)                             | 0 (0%)                                        | 0 (0%)                          | 1 (0.0%)                   |
| 8 (3.7%)                          | 44 (4.7%)                           | 20 (5.7%)                          | 26 (5.2%)                                     | 9 (20.9%)                       | 135 (4.2%)                 |
